# Supplementary material for: The In Vitro Inhibitory Effect of Selected Asteraceae Plants on Pancreatic Lipase Followed by Phenolic Content Identification through Liquid Chromatography High Resolution Mass Spectrometry (LC-HRMS)
Source: MDPI journal article supplement (doi:10.3390/ijms231911204), 2022-09-23
Supplement: s1 [file s1]

## **SUPPLEMENTARY MATERIALS**

### **The In Vitro Inhibitory Effect of Selected Asteraceae Plants on Pancreatic Lipase Followed by Phenolic Content Identification through Liquid Chromatography High Resolution Mass Spectrometry (LC-HRMS)**

**A. S. Tsagkaris<sup>a\*</sup>, A. Louckova<sup>a</sup>, T. Jaegerova<sup>a</sup>, V. Tokarova<sup>b</sup>, J. Hajslova<sup>a</sup>**

a. Department of Food Analysis and Nutrition, Faculty of Food and Biochemical Technology, University of Chemistry and Technology Prague, Technická 5, 166 28 Prague 6 – Dejvice, Prague, Czech Republic

b. Department of Chemical Engineering, Faculty of Chemical Engineering, University of Chemistry and Technology Prague, Technická 5, 166 28 Prague 6 – Dejvice, Prague, Czech Republic

Corresponding authors: [tsagkara@vscht.cz](mailto:tsagkara@vscht.cz)

## S1. Supporting information on substrate selection

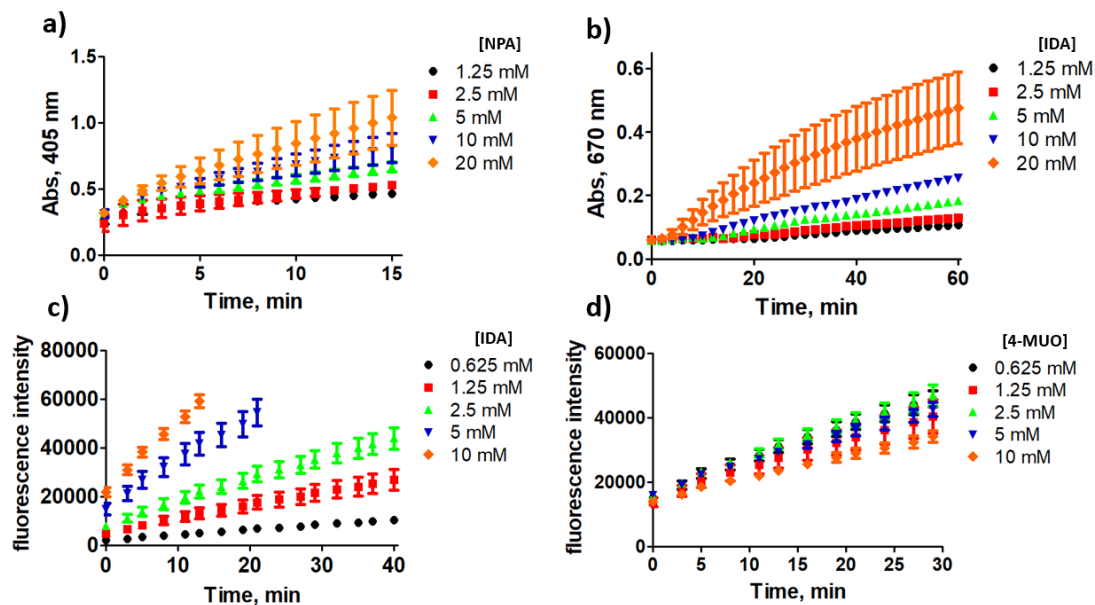

**Figure S1.** PNLIP assay signal development using a) NPA, b,c) IDA and d) 4-MUO as the substrate. PNLIP concentration was 1250  $\mu\text{g mL}^{-1}$  in every case and each point represents the mean value ( $n=9$ ) and the error bars represent the standard deviation in each case.

## S2. Supporting information on assay optimisation

**Table S1.** Calculated  $K_m$  and  $V_{max}$  at different end-points using  $1250 \mu\text{g mL}^{-1}$  PNLIP. The results are expressed as “mean (95% intervals)” (n=6 replicates per level).

| end-point (min) | $K_m$ (mM)  | $V_{max}$ (dAbs/min) |
|-----------------|-------------|----------------------|
| 5               | 16 (9.6-22) | 0.066 (0.054-0.078)  |
| 10              | 14 (6.2-23) | 0.046 (0.035-0.058)  |
| 20              | 17 (4.6-29) | 0.043 (0.029-0.058)  |
| 40              | 14 (8.1-19) | 0.035 (0.029-0.041)  |
| 60              | 16 (10-22)  | 0.035 (0.029-0.041)  |

### S3. Indicative XIC chromatograms

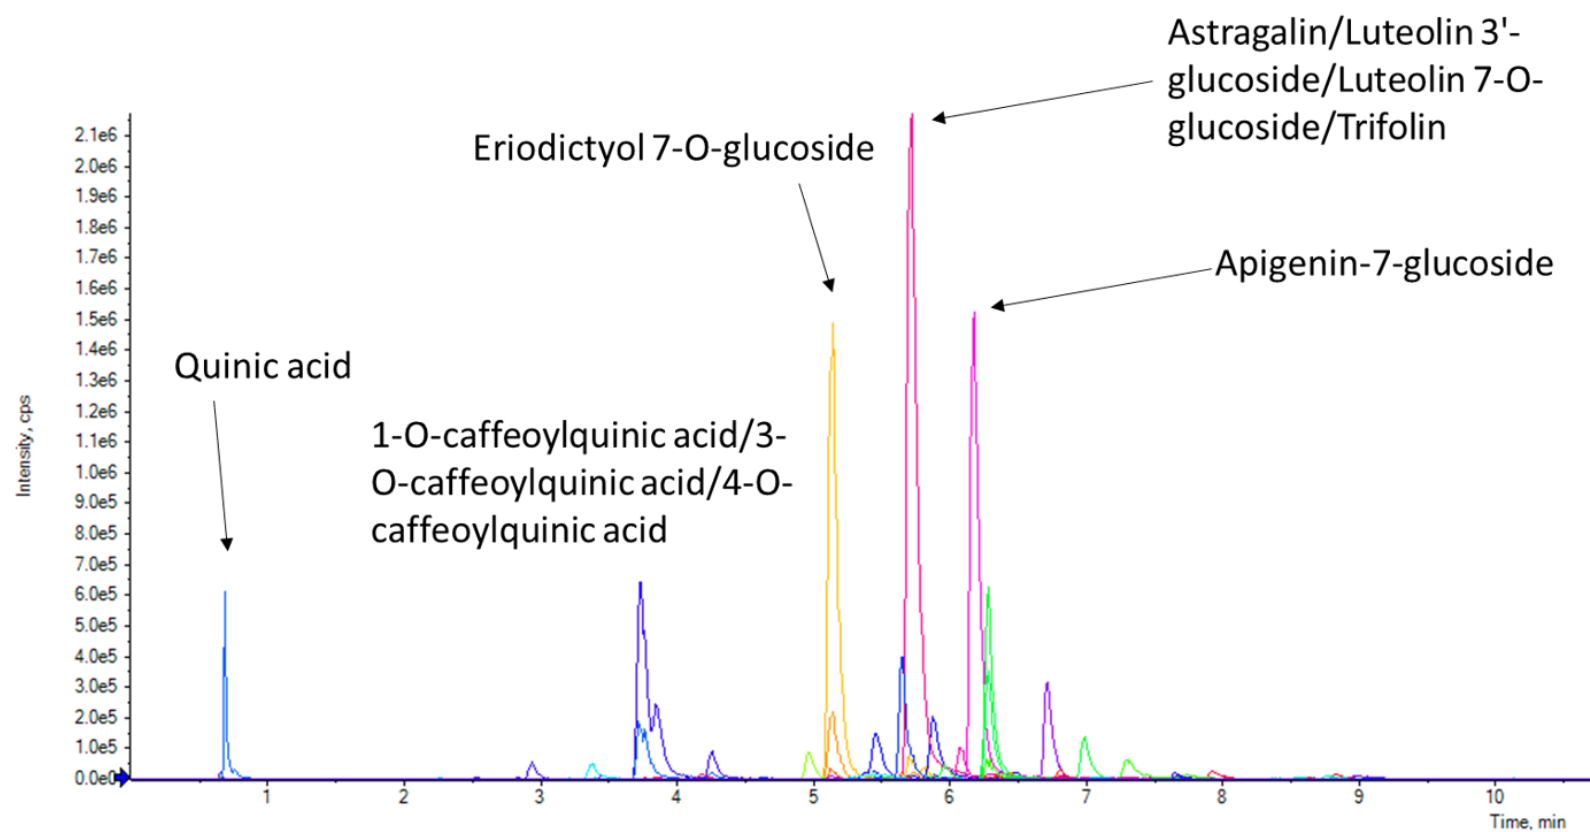

**Figure S2.** XIC chromatogram of *Chrysanthemum morifolium* flower aqueous extract, ESI-.

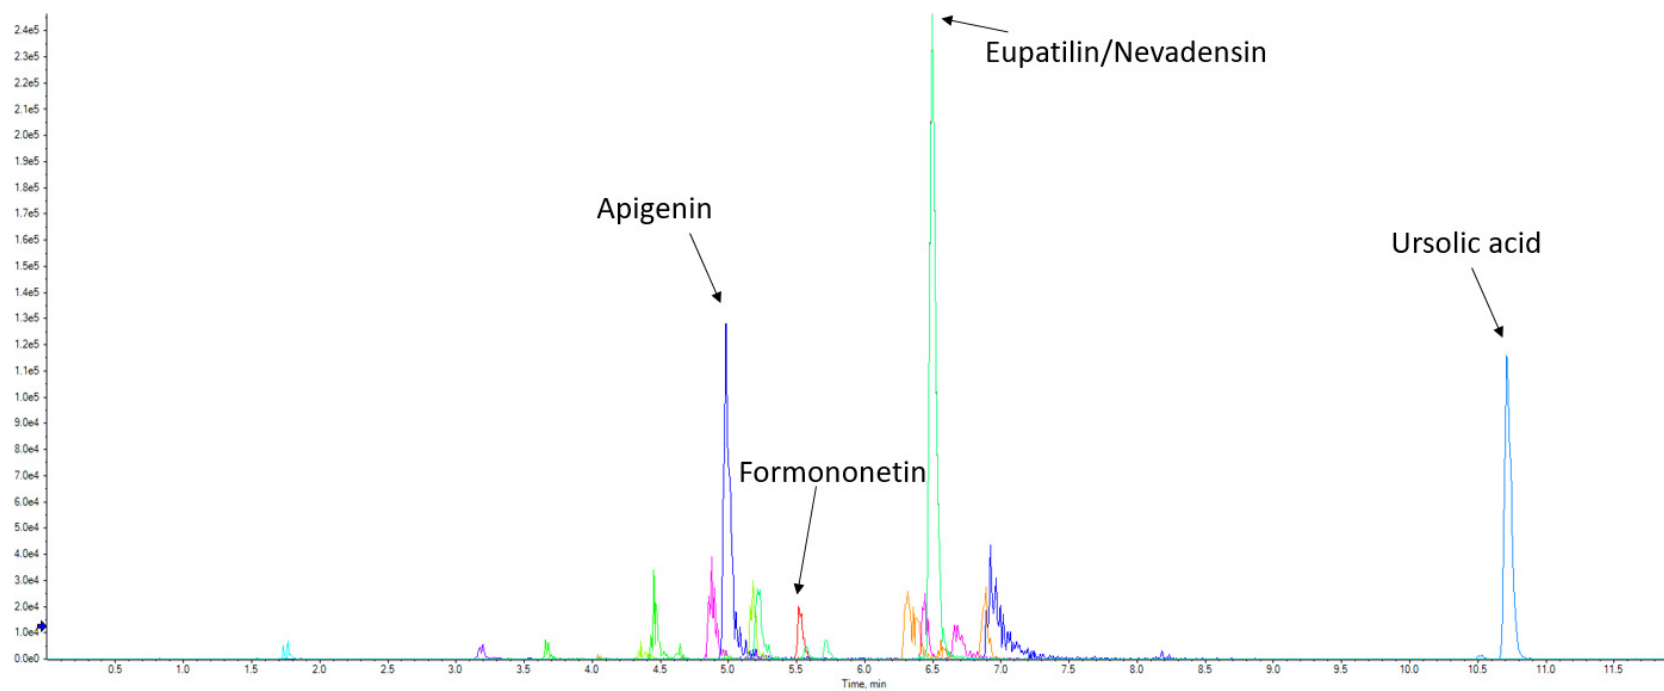

**Figure S3.** XIC chromatogram of *Achillea millefolium* leaves dichloromethane extract, ESI-.

#### S4. Enzyme assays protocols

##### *PNLIP assay using NPA as the substrate*

Eighty  $\mu\text{L}$  PNLIP ( $1250 \mu\text{g mL}^{-1}$ ) were incubated with 10  $\mu\text{L}$  of a sample for 15 min. Next, 10  $\mu\text{L}$  of a NPA solution (in the range 1.25-20 mM) in DMSO were added and the absorbance was measured at 405 nm for 15 min.

##### *PNLIP assay using IDA as the substrate*

Eighty  $\mu\text{L}$  PNLIP ( $1250 \mu\text{g mL}^{-1}$ ) were incubated with 10  $\mu\text{L}$  of a sample for 15 min. Next, 10  $\mu\text{L}$  of an IDA solution (in the range 1.25-20 mM) in DMSO were added and the absorbance was measured at 670 nm for 60 min. In the case of fluorescence monitoring, 10  $\mu\text{L}$  of an IDA solution (in the range 0.625-10 mM) in DMSO were added and the fluorescent signal was monitored using the following wavelengths  $\lambda_{\text{exc}} = 395 \text{ nm}$  and  $\lambda_{\text{em}} = 470 \text{ nm}$ .

##### *PNLIP assay using 4-MUO as the substrate*

Eighty  $\mu\text{L}$  PNLIP ( $1250 \mu\text{g mL}^{-1}$ ) were incubated with 10  $\mu\text{L}$  of a sample for 15 min. Next, 10  $\mu\text{L}$  of a 4-MUO solution (in the range 0.625-10 mM) in DMSO were added and the fluorescent signal was monitored using the following wavelengths  $\lambda_{\text{exc}} = 355 \text{ nm}$  and  $\lambda_{\text{em}} = 460 \text{ nm}$ .

#### S5. Tested plants

**Table S2.** The list of samples investigated for PNLIP inhibition potency.

| Botanical Family | Species                     | Common name               | Part of plant |
|------------------|-----------------------------|---------------------------|---------------|
| Asteraceae       | <i>Achillea millefolium</i> | Yarrow                    | Leaves        |
|                  | <i>Anthemis nobilis</i>     | Chamomile Herb            | Flower        |
|                  | <i>Arctium lappa</i>        | Burdock Root              | Root          |
|                  | <i>Artemisia abrotanum</i>  | Southernwood Herb         | Leaf          |
|                  | <i>Artemisia absinthium</i> | Wormwood                  | Aerial parts  |
|                  | <i>Artemisia annua</i>      | Sweet wormwood (Qing Hao) | Stem          |

|                                  |                             |              |
|----------------------------------|-----------------------------|--------------|
| <i>Artemisia dracunculus</i>     | Tarragon Herb               | Leaf         |
| <i>Artemisia vulgaris</i>        | Mugwort Herb                | Aerial parts |
| <i>Atractylodes macrocephala</i> | Atractylodes                | Rhizome      |
| <i>Calendula officinalis</i>     | Marigold flowers            | Flower       |
| <i>Calendula officinalis</i>     | Marigold Petals             | Petal        |
| <i>Cichorium intybus</i>         | Chicory Root                | Root         |
| <i>Cnicus benedictus</i>         | Holythistle                 | Aerial parts |
| <i>Cynara cardunculus</i>        | Artichoke                   | Leaf of stem |
| <i>Eclipta alba</i>              | Bhringaraj Root             | Root         |
| <i>Echinacea angustifolia</i>    | Echinacea Angustifolia Root | Root         |
| <i>Echinacea purpurea</i>        | Echinacea Purpurea Root     | Root         |
| <i>Eupatorium perfoliatum</i>    | Boneset                     | Leaf         |
| <i>Eupatorium purpureum</i>      | Gravel root                 | Root         |
| <i>Grindelia camporum</i>        | Grindelia Herb              | Aerial parts |
| <i>Helianthus annuus</i>         | Sunflower seed              | Seed         |
| <i>Hieracium pilosella</i>       | Mouseear, hawkweed          | Aerial parts |
| <i>Chrysanthemum morifolium</i>  | Chrysanthemum flowers       | Flower       |
| <i>Inula helenium</i>            | Elecampane Root             | Root         |
| <i>Lactuca sativa</i>            | Lettuce                     | Leaf         |
| <i>Lactuca virosa</i>            | Wild Lettuce                | Leaf         |
| <i>Matricaria recutita</i>       | Chamomile, German           | Flower       |
| <i>Silybum marianum</i>          | Milkthistle Seed            | Seed         |
| <i>Solidago virgaurea</i>        | Golden Rod                  | Aerial parts |
| <i>Stevia rebaudiana</i>         | Stevia leaf                 | Leaf         |
| <i>Tanacetum parthenium</i>      | Feverfew Herb               | Aerial parts |
| <i>Tanacetum vulgare</i>         | Tansy Herb                  | Aerial parts |
| <i>Taraxacum officinale</i>      | Dandelion Herb              | Leaf         |
| <i>Taraxacum officinale</i>      | Dandelion Root              | Root         |
| <i>Tussilago farfara</i>         | Coltsfoot                   | Aerial parts |

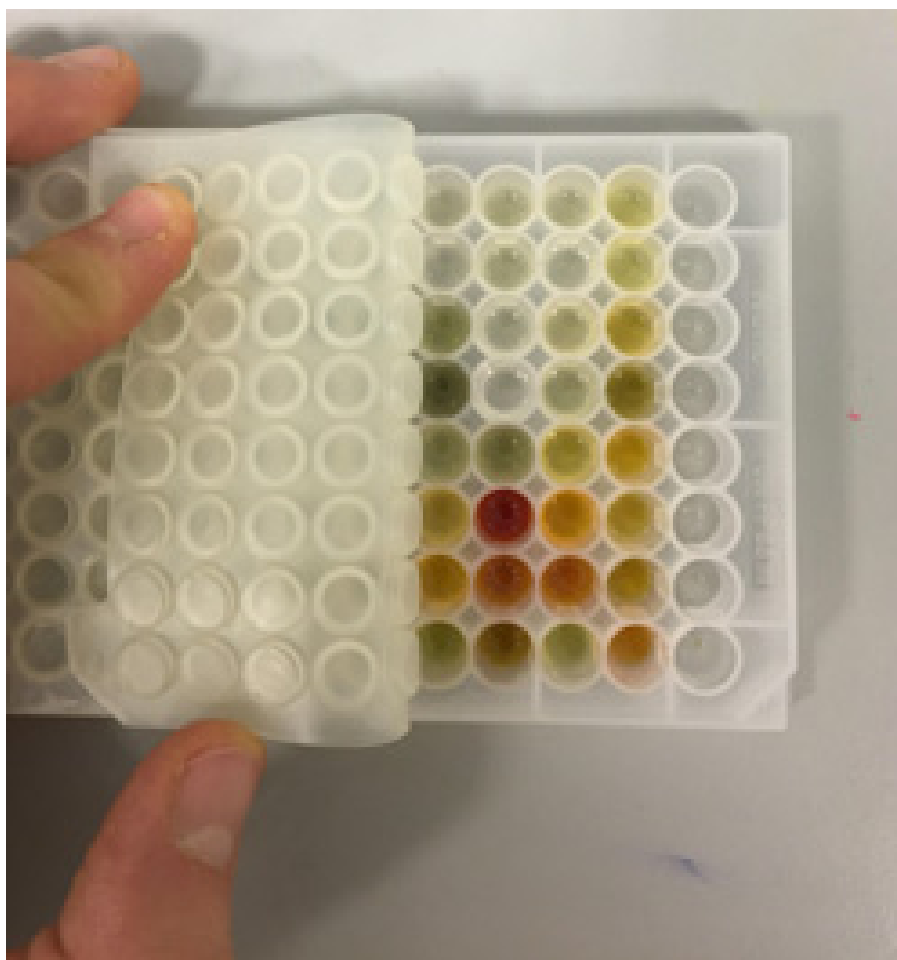

**Figure S4.** The microplate format in which the purchased extracts were stored



## S6. Formulas for inhibition rate calculation

### *Raw data correction*

1. Test sample raw absorbance was corrected by subtracting the raw data of the test blank sample and the raw data of substrate blank (both not containing any PNLIP solution) from the test sample raw data.

$$\text{Corrected test sample Abs} = A_{\text{test sample}} - A_{\text{test sample blank}} - A_{\text{substrate blank}} \text{ (S1)}$$

2. Positive control (orlistat) raw absorbance was corrected by subtracting the raw data of the substrate blank (not containing any PNLIP solution) from the positive control raw data.

$$\text{Corrected positive control Abs} = A_{\text{positive control}} - A_{\text{substrate blank}} \text{ (S2)}$$

3. Negative control-buffer blank: raw data of buffer blank was corrected by calculating raw data of buffer blank minus substrate blank.

$$\text{Corrected negative control Abs} = A_{\text{test buffer blank}} - A_{\text{test substrate blank}} \text{ (S3)}$$

### *Inhibition rate% using the blank corrected data*

4. The inhibition rate% was based on the ratio of the corrected absorbance of a sample (test sample or positive control) divided by the corrected absorbance of the negative control.

$$\text{Inhibition rate\%} = 1 - (A_{\text{corrected sample}} / A_{\text{corrected negative control}}) \times 100 \text{ (S4)}$$
